# Supplementary material for: Diffuse Adrenal Gland and Pancreas Necrosis in a Patient with Disseminated Cryptococcosis—Case Report
Source: MDPI journal article supplement (doi:10.3390/life12101667), 2022-10-21
Supplement: s1 [file s1]

**Table S1.** Patient's laboratory data on day 1 of admission

| Parameter           | Patient's value | Reference range | Units                 |
|---------------------|-----------------|-----------------|-----------------------|
| Na                  | 130             | 135- 145        | mmol/L                |
| K                   | 4.6             | 3.3- 5.3        | mmol/L                |
| Cl                  | 96              | 98- 107         | mmol/L                |
| CO2 (venous)        | 28              | 22- 32          | mmol/L                |
| eGFR                | >60             | >60             | mL/min/1.73_m3        |
| Blood urea nitrogen | 17              | 5- 25           | mg/dL                 |
| Creatinine          | 1.2             | 0.5- 1.4        | mg/dL                 |
| Glucose             | 162             | 70- 110         | mg/dL                 |
| Lactate             | 1.7             | 0- 2            | mg/dL                 |
| Procalcitonin       | 1               | 0- 0.1          | µg/L                  |
| WBC                 | 6.9             | 4.5- 11         | x 10 <sup>9</sup> /L  |
| RBC                 | 5.16            | 4.5- 5.9        | x 10 <sup>12</sup> /L |
| Hgb                 | 15              | 12- 16          | g/dL                  |
| HCT                 | 45.3            | 41- 52          | %                     |
| MCV                 | 87.8            | 80- 100         | fl                    |
| MCHC                | 33.1            | 31.5- 36        | g/dL                  |
| Platelet count      | 215             | 150- 450        | x 10 <sup>9</sup> /L  |

**Table S2.** Clinical manifestations and organ involvement of previous cases of Cryptococcal adrenalitis. Abbreviations: AF tx: anti-fungal therapy; AG: adrenal gland; AI: adrenal insufficiency; CNS: central nervous system; HT: hypertension; SAH: subarachnoid hemorrhage; Type-2 diabetes mellitus: T2DM; TB: tuberculosis; yo: -year-old; w: with; w/o: without.

| Clinical presentation                                                                                                                                                                                      | Immuno-competent                                                              | Co-morbidities                                                                                                  | Organ involvement                                                                                                                                                            | Treatment                                                                                            | Outcome                                                                                             | Ref. |
|------------------------------------------------------------------------------------------------------------------------------------------------------------------------------------------------------------|-------------------------------------------------------------------------------|-----------------------------------------------------------------------------------------------------------------|------------------------------------------------------------------------------------------------------------------------------------------------------------------------------|------------------------------------------------------------------------------------------------------|-----------------------------------------------------------------------------------------------------|------|
| <b>A.</b> Autopsy report of a 41 yo patient w extensive fatigue, weakness, headache, uveitis, and no hypotension<br><b>B.</b> Plus: a review of further 7 cases from the literature (6 w/o symptoms of AI) | <b>A.</b> Yes<br><b>B.</b> Unknown                                            | <b>A.</b> Chronic cough, headaches for 15 years, obesity<br><b>B.</b> TB, Hodgkin lymphoma, with others unknown | <b>A.</b> Adrenal glands (AGs) (with massive necrosis in all zones), meninges, kidneys, eye<br><b>B.</b> AGs (5:organisms w/o inflammation, 1: partial necrosis, 1: unknown) | <b>A.</b> Not treated/ not recognized before death<br><b>B.</b> Unknown                              | <b>A.</b> Patient suddenly deteriorated and died before the diagnosis was made<br><b>B.</b> Unknown | [20] |
| <b>A.</b> A case report of a 39 yo patient w frontal headaches, who developed meningitis and papilla edema, when found to have cryptococcal infection, and suddenly died on day 15 of                      | <b>A.</b> Yes, but on steroid treatment for co-morbidity<br><b>B.</b> Unknown | <b>A.</b> Temporal arteritis<br><b>B.</b> Unknown, but 18/41 patients were on steroid treatment                 | <b>A.</b> Complete AG destruction (with minimal normal tissue + large areas of necrosis in all zones), meninges, disseminated infection                                      | <b>A.</b> Anti-fungal therapy (AF tx), and steroid (for his temporal arteritis)<br><b>B.</b> Unknown | <b>A.</b> The patient suddenly deteriorated and died<br><b>B.</b> N/A                               | [21] |

|                                                                                                                                                         |     |              |                                                                                                                                      |                                                                                                      |                               |      |
|---------------------------------------------------------------------------------------------------------------------------------------------------------|-----|--------------|--------------------------------------------------------------------------------------------------------------------------------------|------------------------------------------------------------------------------------------------------|-------------------------------|------|
| treatment with no other AI symptoms<br><b>B.</b> Lookback on autopsy cases, with 11/41 showing AG involvement, 39 w disseminated cryptococcal infection |     |              | <b>B.</b> AGs (5/11 of cases with extensive involvement, but with large amount of normal tissue remaining; the rest w small lesions) |                                                                                                      |                               |      |
| 40 yo w persistent meningitis w unknown organism & years later w anorexia, weight loss, weakness, fatigue, hypotension, and hyponatremia                | Yes | Unknown      | AGs (w massive AG destruction, granulomatous inflammation & necrosis), disseminated infection                                        | AF tx (diagnosis was made on resection specimen)                                                     | Improved                      | [22] |
| 3 of 15 patients on autopsy showed adrenal gland involvement                                                                                            | No  | HIV          | AGs, and disseminated infection                                                                                                      | AF tx                                                                                                | N/A                           | [23] |
| 32 autopsy cases with presenting symptoms including vomiting, diarrhea, fever, hypotension, and hyponatremia; 3/41 with cryptococcal infection          | No  | HIV          | 3/41 autopsy cases showed cryptococcal AG involvement, and disseminated infection                                                    | Unknown                                                                                              | N/A                           | [24] |
| 72 yo patient with progressive weakness, postural hypotension, anorexia, and weight loss                                                                | Yes | Not recorded | AG, meninges, lung                                                                                                                   | AF tx + bilateral adrenalectomy (massive caseation necrosis with fungal elements consistent with CN) | Patient deteriorated and died | [25] |
| 48 yo patient with fatigue, anorexia, weight loss, headaches, skin darkening, and acute right-sided weakness, hyponatremia                              | Yes | None         | AGs, Meninges                                                                                                                        | AF tx                                                                                                | Improved                      | [26] |
| 58 yo patient with AG enlargement and AI (confusion, weakness, anorexia, weight loss, increased skin pigmentation)                                      | Yes | Previous SAH | AGs, CNS                                                                                                                             | AF tx                                                                                                | Unknown                       | [27] |
| 62 yo patient with flank pain                                                                                                                           | Yes | T2DM         | AG                                                                                                                                   | Diagnosis after surgical resection, AF tx started afterward                                          | Successfully treated          | [28] |
| 50 yo patient with anorexia, weight loss, nausea, increased skin pigmentation,                                                                          | Yes | None         | AGs initially; Later with disseminated                                                                                               | Initially treated with anti-TB medications w/o evidence of TB infection; AF tx                       | Improved                      | [29] |

|                                                                                                                                                                                 |                                                |                                                                                                      |                             |                                                                                                                                      |                                        |      |
|---------------------------------------------------------------------------------------------------------------------------------------------------------------------------------|------------------------------------------------|------------------------------------------------------------------------------------------------------|-----------------------------|--------------------------------------------------------------------------------------------------------------------------------------|----------------------------------------|------|
| hyponatremia, and bilateral AG hyperplasia                                                                                                                                      |                                                |                                                                                                      | disease involving the CNS   | afterwards + bilateral adrenalectomy                                                                                                 |                                        |      |
| 57 yo patient with headache and later developed hyponatremia                                                                                                                    | Yes                                            | T2DM                                                                                                 | AGs, Meninges               | AF tx + bilateral adrenalectomy                                                                                                      | Successfully treated                   | [30] |
| 7 of 128 autopsy cases showed cryptococcal, and 4 of 128 showed cryptococcal + CMV involvement in the AGs w inflammatory infiltrate and necrosis, rare fibrosis and hemorrhages | HIV infection                                  | Unknown                                                                                              | AGs                         | Unknown                                                                                                                              | N/A                                    | [31] |
| 1 of 13 autopsy cases showed AG involvement; and 45 yo patient with no clinical diagnosis of cryptococcal infection                                                             | Unknown                                        | Meningitis in childhood, hydrocephalus, repeated drainage operations; and TB epinephritis on autopsy | AGs, spine                  | Not treated                                                                                                                          | N/A                                    | [32] |
| 46 yo patient w primary AI                                                                                                                                                      | Yes                                            | None                                                                                                 | AGs                         | AF tx                                                                                                                                | Successfully treated                   | [19] |
| 45 yo patient w dizziness, fatigue, anorexia, weight loss, skin hyperpigmentation, hyponatremia,                                                                                | Yes                                            | None                                                                                                 | AGs, disseminated infection | AF tx                                                                                                                                | No change in AG enlargement on imaging | [33] |
| 43 yo patient w high-grade fevers and weight loss                                                                                                                               | Yes                                            | T2DM                                                                                                 | AGs, Liver                  | AF tx + unilateral adrenalectomy                                                                                                     | Significantly improved                 | [5]  |
| 52 yo patient with weight loss and malaise for 3 weeks                                                                                                                          | Yes                                            | Newly diagnosed mucinous adenocarcinoma, pT1b pN0 pMx, stage IA                                      | AGs                         | AF tx, patient refused adrenalectomy when follow-up imaging showed no change in the size of adrenal nodules, but clinically improved | Successfully treated                   | [34] |
| 65 yo patient w fever                                                                                                                                                           | Yes                                            | T2DM, HT                                                                                             | AGs, Lungs                  | AF tx                                                                                                                                | Successfully treated                   | [35] |
| 24 yo patient w fevers, headache, and altered consciousness                                                                                                                     | Yes, but on steroid treatment for co-morbidity | protein-losing gastro-enteropathy                                                                    | AGs, Meninges               | AF tx                                                                                                                                | Successfully treated                   | [36] |

|                                                                                            |     |      |                      |                                 |                                                                        |      |
|--------------------------------------------------------------------------------------------|-----|------|----------------------|---------------------------------|------------------------------------------------------------------------|------|
| 49 yo patient w 2 months history of anorexia, weight loss, and increased skin pigmentation | Yes | None | AGs, meninges        | AF tx + bilateral adrenalectomy | resistant to prolonged AF tx but responding to bilateral adrenalectomy | [37] |
| 50 yo patient with AI, meningoencephalitis, and lytic bone lesions                         | Yes | None | AGs, CNS, skin, bone | AF tx                           | Successfully treated, but adrenal insufficiency remained               | [38] |
